# Supplementary material
Source: PubMed Central journal article supplement (PMC3819630)
Supplement: neo1510_1138SD1.pdf [file neo1510_1138SD1.pdf]

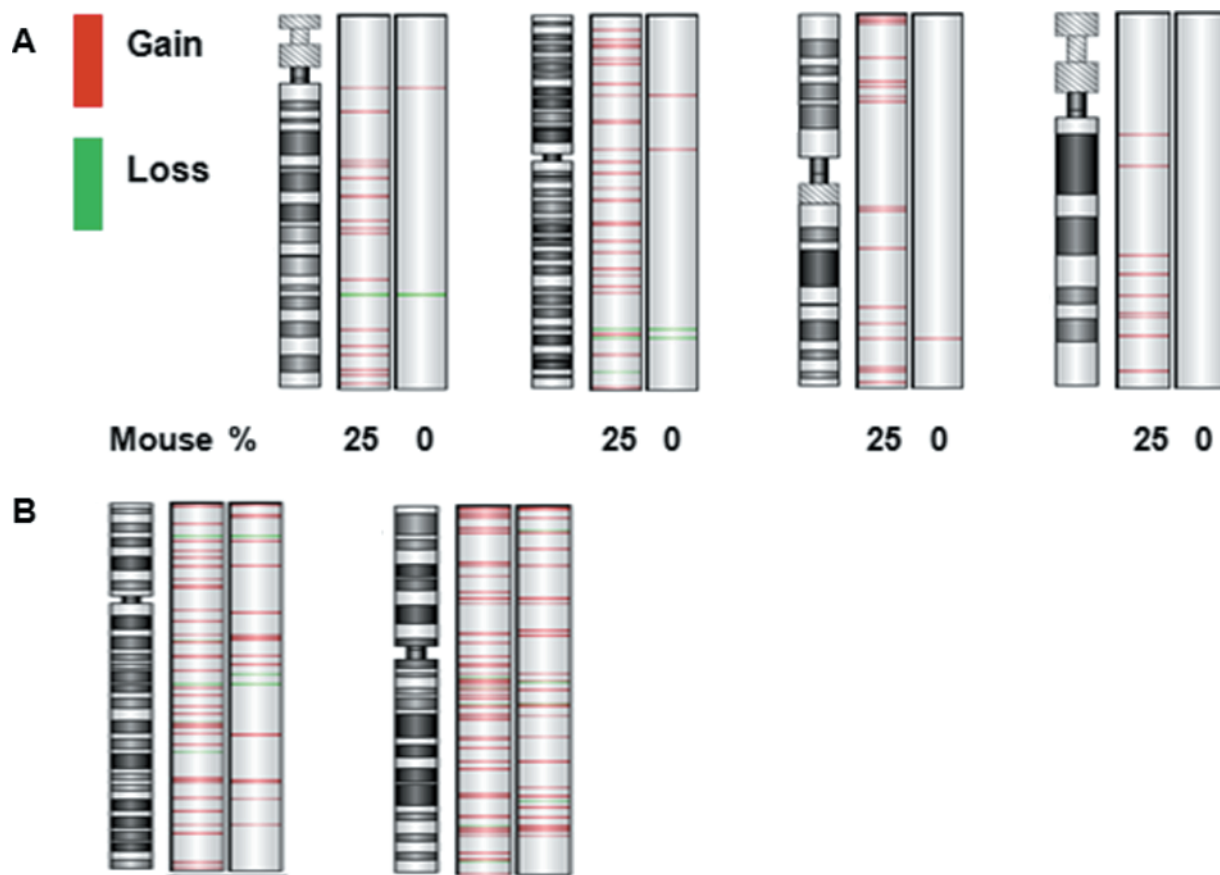

**Figure W1.** Mouse gDNA cross-hybridization on aCGH arrays. (A) Evaluation of cross-hybridization of mouse gDNA on human aCGH arrays. Equal amounts of human reference gDNA ( $1 \mu\text{g}$ ) were labeled with Cy3 and Cy5, hybridized to the aCGH arrays (right bar, 0% mouse), and compared to 75% human/25% mouse mixture (left bar, 25% mouse). Selected chromosomes are displayed above. Additional red bands in the bars on the left side are indicative of gains (cross-hybridization). (B) Comparison of original tumor (right bar) *versus* xenograft passage 4 with high mouse component (47%, left bar). Two selected chromosomes are shown, with evidence of greater amounts of gains/amplifications in the xenograft passage with high mouse component.

**Pearson correlation coefficient (specimen comparisons)**

| <u>Model</u> | <u>Xenograft passage</u> | <u>Pearson Correlation</u> |
|--------------|--------------------------|----------------------------|
| AG-Panc2     | p6                       | 0.90                       |
| AG-Panc2     | p17                      | 0.90                       |
|              | p6 vs. p17               | 0.975                      |
| AG-Panc3     | p6                       | NA                         |
| AG-Panc3     | p18                      | NA                         |
|              | p6 vs. p18               | 0.98                       |
| AG-Panc4     | p5                       | 0.9                        |
| AG-Panc4     | p16                      | 0.9                        |
|              | p5 vs. p16               | 0.98                       |
| AG-Panc5     | p6                       | 0.875                      |
| AG-Panc5     | p12                      | 0.875                      |
|              | p6 vs. p12               | 0.98                       |
| AG-Panc6     | p1                       | 0.91                       |
| AG-Panc6     | p7                       | 0.91                       |
|              | p1 vs. p7                | 0.98                       |
| AG-Panc8     | p3                       | 0.89                       |
| AG-Panc8     | p5                       | 0.9                        |
|              | p3 vs. p5                | 0.99                       |
| AG-Panc9     | p2                       | 0.89                       |
|              | p4                       | 0.89                       |
|              | p2 vs. p4                | 0.98                       |
| AG-Panc10    | p4                       | 0.92                       |

**Orthotopic comparisons**

| <u>Model</u> | <u>Orthotopic passage</u> | <u>Pearson Correlation</u> |
|--------------|---------------------------|----------------------------|
| AG-Panc2 p6  | from SQ P10               | 0.93-0.96                  |
|              | from SQ P39               | 0.93                       |
| AG-Panc2 p17 | from SQ P10               | 0.92-0.95                  |
|              | from SQ P39               | 0.95                       |
| AG-Panc10 p4 | OT P1                     | 0.97                       |
|              | OT P2                     | 0.98                       |
| AG-Panc13 p0 | OT P0                     | 0.97                       |
|              | OT P1                     | 0.98                       |

**Figure W2.** Comparison of genome-wide gene expression profiles among samples.



| Variable                  | AG-Panc2-T | AG-Panc2-T | AG-Panc2-T | AG-Panc2-P1 |      |
|---------------------------|------------|------------|------------|-------------|-------------|-------------|-------------|-------------|-------------|-------------|-------------|-------------|-------------|-------------|-------------|-------------|-------------|-------------|-------------|-------------|------|
| AG-Panc2-T                | 1.00       | 0.99       | 0.98       | 0.90        | 0.89        | 0.89        | 0.91        | 0.90        | 0.90        | 0.87        | 0.89        | 0.88        | 0.89        | 0.94        | 0.89        | 0.89        | 0.89        | 0.88        | 0.88        | 0.88        | 0.88 |
| AG-Panc2-T                | 0.99       | 1.00       | 0.99       | 0.89        | 0.90        | 0.90        | 0.90        | 0.90        | 0.90        | 0.86        | 0.88        | 0.87        | 0.88        | 0.94        | 0.89        | 0.88        | 0.88        | 0.88        | 0.87        | 0.88        | 0.88 |
| AG-Panc2-T                | 0.98       | 0.99       | 1.00       | 0.89        | 0.90        | 0.90        | 0.90        | 0.90        | 0.90        | 0.86        | 0.88        | 0.87        | 0.88        | 0.93        | 0.88        | 0.88        | 0.88        | 0.88        | 0.87        | 0.88        | 0.88 |
| AG-Panc2-P17              | 0.90       | 0.89       | 0.89       | 1.00        | 0.99        | 0.99        | 0.98        | 0.97        | 0.97        | 0.93        | 0.95        | 0.95        | 0.95        | 0.90        | 0.94        | 0.94        | 0.94        | 0.93        | 0.93        | 0.93        | 0.94 |
| AG-Panc2-P17              | 0.89       | 0.90       | 0.90       | 0.99        | 1.00        | 0.99        | 0.97        | 0.98        | 0.97        | 0.92        | 0.95        | 0.95        | 0.95        | 0.90        | 0.94        | 0.94        | 0.94        | 0.93        | 0.93        | 0.94        | 0.94 |
| AG-Panc2-P17              | 0.89       | 0.90       | 0.90       | 0.99        | 0.99        | 1.00        | 0.97        | 0.97        | 0.98        | 0.92        | 0.95        | 0.95        | 0.95        | 0.89        | 0.94        | 0.94        | 0.94        | 0.93        | 0.93        | 0.93        | 0.94 |
| AG-Panc2-P6               | 0.91       | 0.90       | 0.90       | 0.98        | 0.97        | 0.97        | 1.00        | 0.99        | 0.99        | 0.94        | 0.96        | 0.93        | 0.93        | 0.89        | 0.95        | 0.94        | 0.94        | 0.93        | 0.93        | 0.93        | 0.94 |
| AG-Panc2-P6               | 0.90       | 0.90       | 0.90       | 0.97        | 0.98        | 0.97        | 0.99        | 1.00        | 0.99        | 0.93        | 0.96        | 0.93        | 0.93        | 0.90        | 0.95        | 0.94        | 0.94        | 0.93        | 0.93        | 0.93        | 0.94 |
| AG-Panc2-P6               | 0.90       | 0.90       | 0.90       | 0.97        | 0.97        | 0.98        | 0.99        | 0.99        | 1.00        | 0.93        | 0.96        | 0.93        | 0.93        | 0.89        | 0.94        | 0.94        | 0.94        | 0.93        | 0.93        | 0.93        | 0.94 |
| AG-Panc2 OT (from SQ P10) | 0.87       | 0.86       | 0.86       | 0.93        | 0.92        | 0.92        | 0.94        | 0.93        | 0.93        | 1.00        | 0.97        | 0.93        | 0.92        | 0.86        | 0.90        | 0.92        | 0.91        | 0.89        | 0.91        | 0.90        | 0.91 |
| AG-Panc2 OT (from SQ P10) | 0.89       | 0.88       | 0.88       | 0.95        | 0.95        | 0.95        | 0.96        | 0.96        | 0.96        | 0.97        | 1.00        | 0.94        | 0.93        | 0.88        | 0.92        | 0.94        | 0.93        | 0.92        | 0.93        | 0.92        | 0.93 |
| AG-Panc2 OT (from SQ P39) | 0.88       | 0.87       | 0.87       | 0.95        | 0.95        | 0.95        | 0.93        | 0.93        | 0.93        | 0.93        | 0.94        | 1.00        | 0.98        | 0.89        | 0.92        | 0.93        | 0.93        | 0.91        | 0.92        | 0.91        | 0.93 |
| AG-Panc2 OT (from SQ P39) | 0.89       | 0.88       | 0.88       | 0.95        | 0.95        | 0.95        | 0.93        | 0.93        | 0.93        | 0.92        | 0.93        | 0.98        | 1.00        | 0.90        | 0.93        | 0.93        | 0.93        | 0.91        | 0.92        | 0.91        | 0.93 |
| AG-Panc10-T               | 0.94       | 0.94       | 0.93       | 0.90        | 0.90        | 0.89        | 0.89        | 0.90        | 0.89        | 0.86        | 0.88        | 0.89        | 0.90        | 1.00        | 0.92        | 0.91        | 0.91        | 0.89        | 0.89        | 0.89        | 0.90 |
| AG-Panc10-P4              | 0.89       | 0.89       | 0.88       | 0.94        | 0.94        | 0.94        | 0.95        | 0.95        | 0.94        | 0.90        | 0.92        | 0.92        | 0.93        | 0.92        | 1.00        | 0.97        | 0.98        | 0.94        | 0.94        | 0.94        | 0.95 |
| AG-Panc10 OT-P1           | 0.89       | 0.88       | 0.88       | 0.94        | 0.94        | 0.94        | 0.94        | 0.94        | 0.94        | 0.92        | 0.94        | 0.93        | 0.93        | 0.91        | 0.97        | 1.00        | 0.99        | 0.94        | 0.95        | 0.94        | 0.95 |
| AG-Panc10 OT-P2           | 0.89       | 0.88       | 0.88       | 0.94        | 0.94        | 0.94        | 0.94        | 0.94        | 0.94        | 0.91        | 0.93        | 0.93        | 0.93        | 0.91        | 0.98        | 0.99        | 1.00        | 0.94        | 0.95        | 0.94        | 0.95 |
| AG-Panc13-P0              | 0.88       | 0.88       | 0.88       | 0.93        | 0.93        | 0.93        | 0.93        | 0.93        | 0.93        | 0.89        | 0.92        | 0.91        | 0.91        | 0.89        | 0.94        | 0.94        | 0.94        | 1.00        | 0.97        | 0.98        | 0.98 |
| AG-Panc13 OT-P0           | 0.88       | 0.87       | 0.87       | 0.93        | 0.93        | 0.93        | 0.93        | 0.93        | 0.93        | 0.91        | 0.93        | 0.92        | 0.92        | 0.89        | 0.94        | 0.95        | 0.95        | 0.97        | 1.00        | 0.97        | 0.99 |
| AG-Panc13 OT-P1           | 0.88       | 0.88       | 0.88       | 0.93        | 0.94        | 0.93        | 0.93        | 0.93        | 0.93        | 0.90        | 0.92        | 0.91        | 0.91        | 0.89        | 0.94        | 0.94        | 0.94        | 0.98        | 0.97        | 1.00        | 0.98 |
| AG-Panc13 OT-P1           | 0.88       | 0.88       | 0.88       | 0.94        | 0.94        | 0.94        | 0.94        | 0.94        | 0.94        | 0.91        | 0.93        | 0.93        | 0.93        | 0.90        | 0.95        | 0.95        | 0.95        | 0.98        | 0.99        | 0.98        | 1.00 |

Figure W2. (continued).

## Regulated Genes

- FC was calculated compared to normal Pancreas
- FC  $\geq 2.0$ , FDR  $< 0.05$

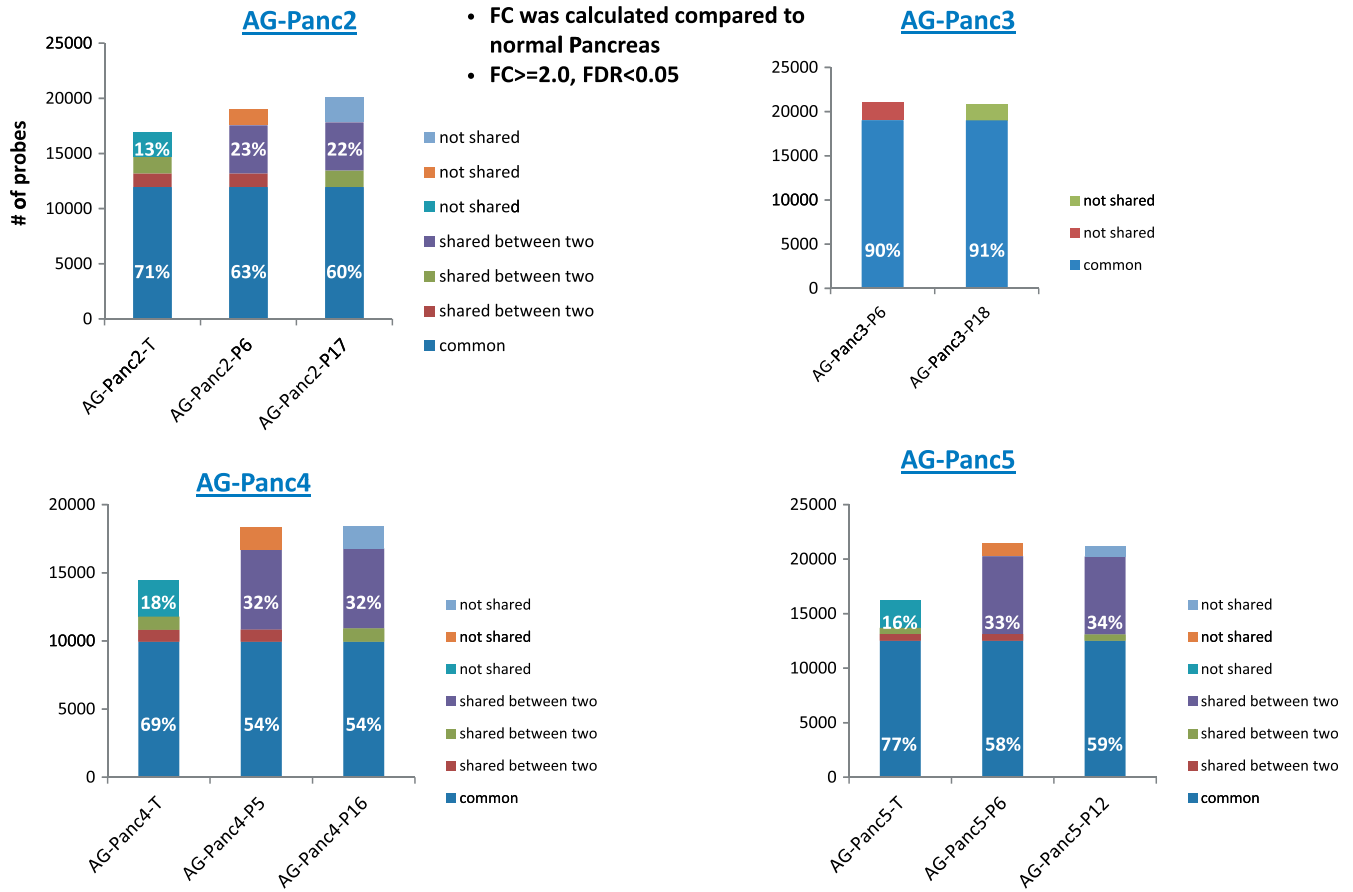

**Figure W3.** Comparison of the number of significantly-regulated probes and number of shared probes between samples.

## Regulated Genes

- FC was calculated compared to normal Pancreas
- FC >= 2.0, FDR < 0.05

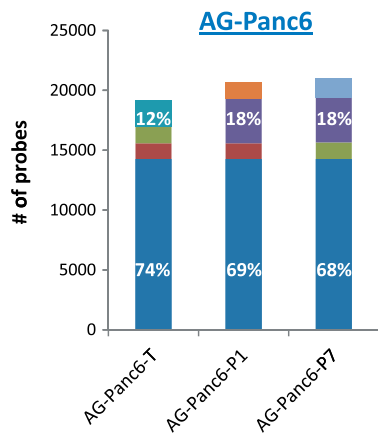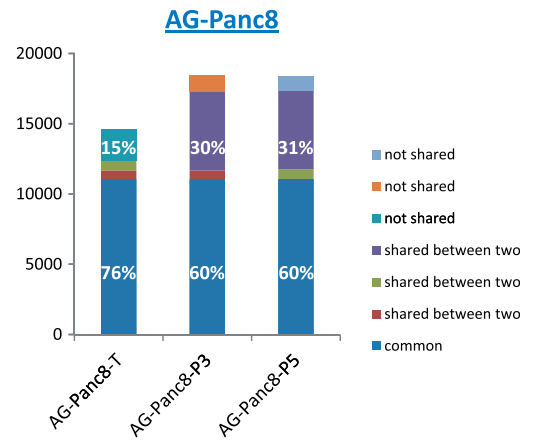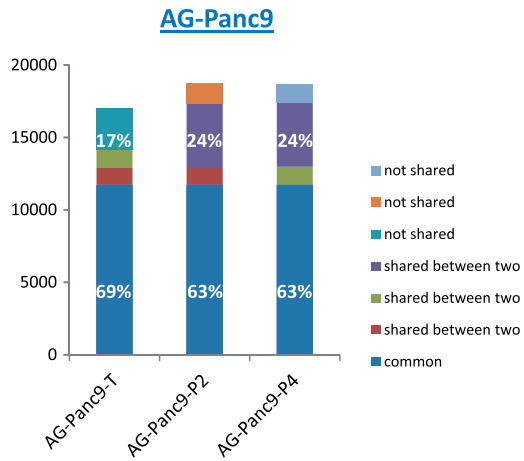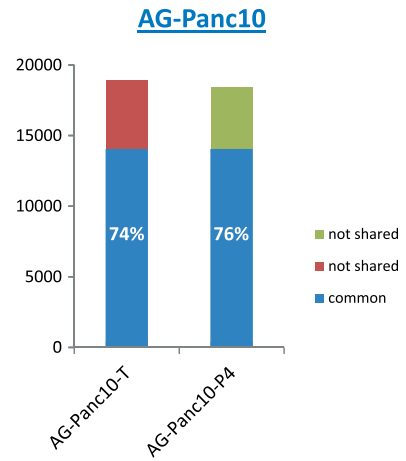

Figure W3. (continued).

## Regulated Genes: AG-Panc2 OT

- FC was calculated compared to normal Pancreas
- $FC \geq 2.0$ ,  $FDR < 0.05$

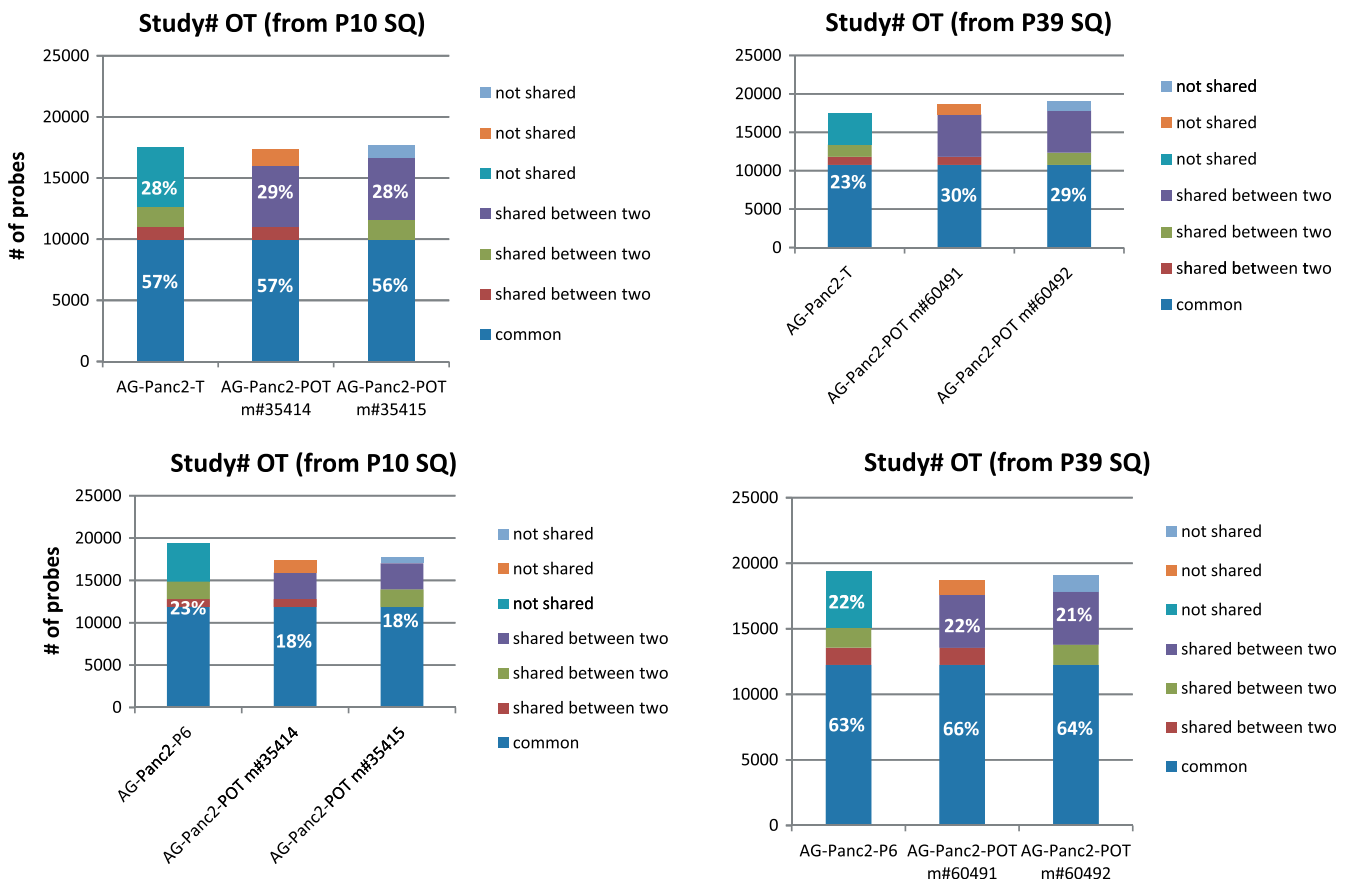

Figure W3. (continued).

### Regulated Genes: AG-Panc10 OT

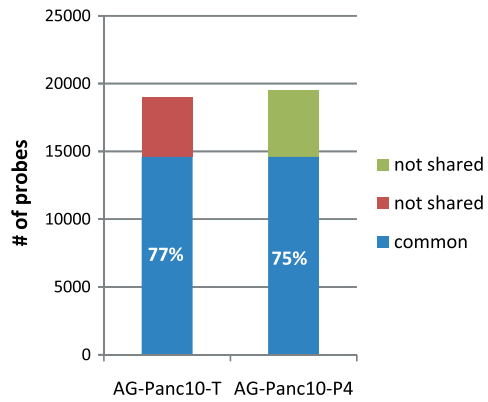

### Regulated Genes: AG-Panc13 OT

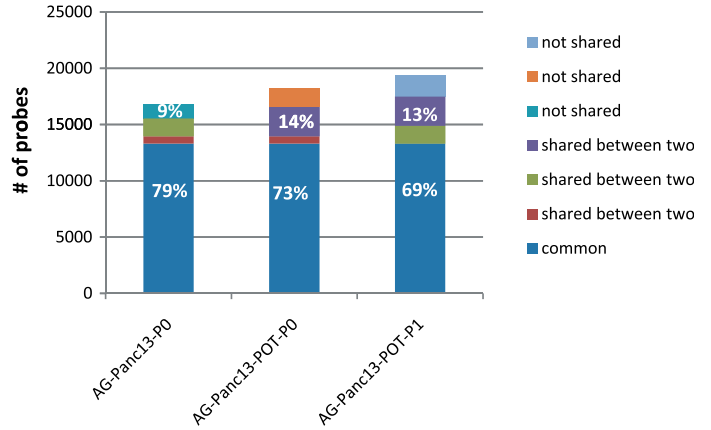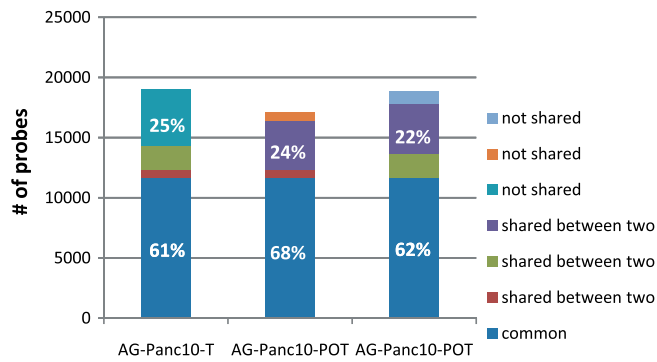

- FC was calculated compared to normal Pancreas
- FC >= 2.0, FDR < 0.05

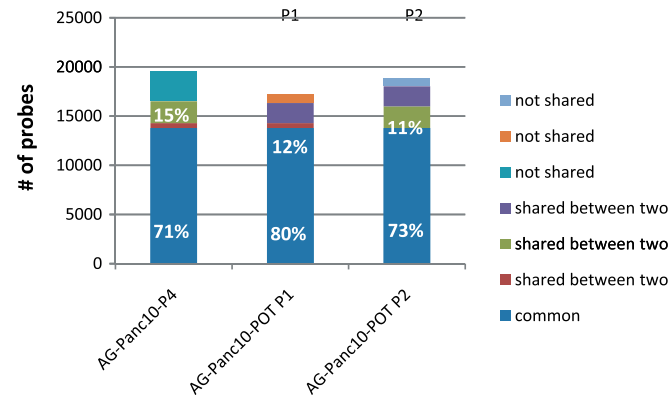

Figure W3. (continued).
